# Supplementary material for: From Maya blue to biomimetic pigments: durable biomimetic pigments with self-cleaning property
Source: Royal Society of Chemistry journal article supplement (doi:10.1039/c5ta09300g), 2015-12-03
Supplement: c5ta09300g5.pdf [file c5ta09300g5.pdf]

## Supporting information

730000 Lanzhou, P.R. China

### From Maya Blue to Biomimetic Pigments: Durable Biomimetic Pigments with Self-Cleaning Property

Yujie Zhang,<sup>a,c</sup> Junping Zhang,<sup>a\*</sup> and Aiqin Wang<sup>a,b\*</sup>

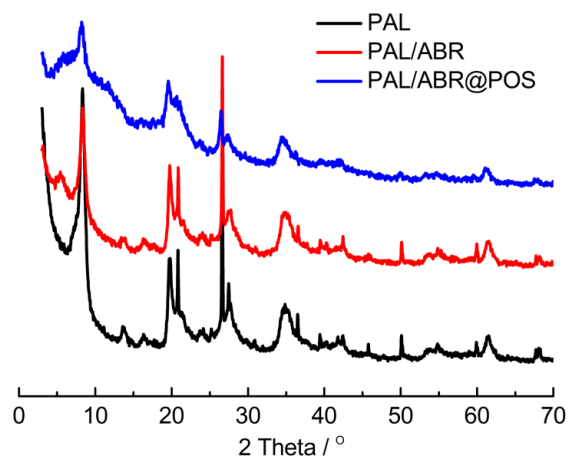

**Fig. S1.** XRD patterns of PAL, PAL/ABR and PAL/ABR@POS.  $C_{\text{HDTMS}} = 0.14 \text{ M}$  and  $C_{\text{TEOS}} = 0.14 \text{ M}$ .

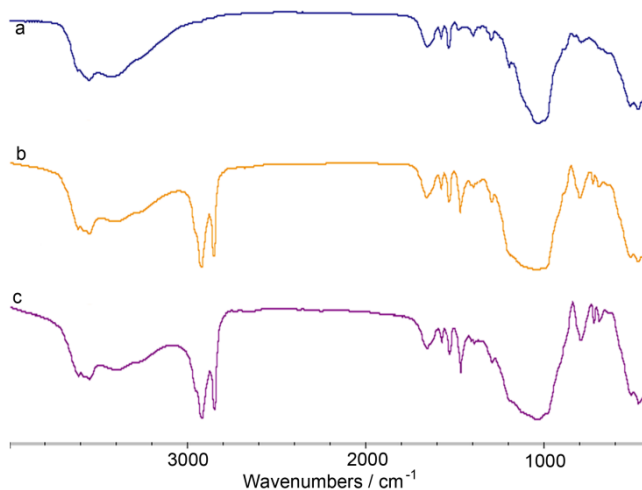

**Fig. S2.** FTIR spectra of PAL/ABR@POS prepared with a  $C_{\text{HDTMS}}$  of (a) 0, (b) 0.14 and (c) 0.235 M.  $C_{\text{TEOS}} = 0.14 \text{ M}$ .

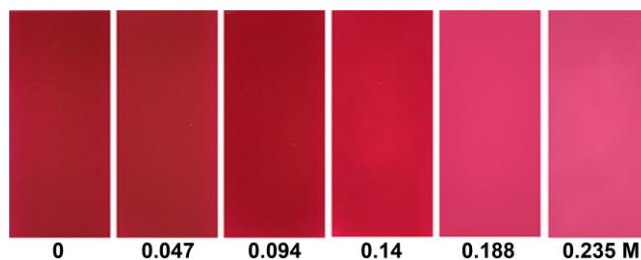

**Fig. S3.** Digital images of the PAL/ABR@POS coatings prepared with different  $C_{\text{TEOS}}$ .  $C_{\text{HDTMS}} = 0.14 \text{ M}$ .

**Movie S1.** Wetting behavior of the PAL/ABR and PAL/ABR@POS pigments. This video highlights the evident difference in wettability between PAL/ABR and PAL/ABR@POS.

**Movie S2.** Water jetting on the surface of the superhydrophobic PAL/ABR@POS pigment.

**Movie S3.** Self-cleaning property of the PAL/ABR@POS pigment.

**Movie S4.** Stability tests of the PAL/ABR and PAL/ABR@POS pigments using 98%  $\text{H}_2\text{SO}_4$  and 60% NaOH. This video highlights the evident difference in stability between PAL/ABR and PAL/ABR@POS.
